# Supplementary material for: Sterically-constrained tripodal phosphorus-bridged tris-pyridyl ligands
Source: Royal Society of Chemistry journal article supplement (doi:10.1039/c5dt04155d), 2015-11-17

## Supporting Information

### Sterically-constrained tripodal phosphorus-bridged *tris*-pyridyl ligands

Schirin Hanf,<sup>a</sup> Raúl García-Rodríguez,<sup>a</sup> Andrew D. Bond,<sup>a</sup> Evamarie Hey-Hawkins<sup>b,\*</sup> and Dominic S. Wright<sup>a,\*</sup>

<sup>a.</sup> Chemistry Department, Cambridge University, Lensfield Road, CB2 1EW, Cambridge, UK.

<sup>b.</sup> Institute of Inorganic Chemistry, Faculty of Chemistry and Mineralogy, Leipzig University, Johannisallee 29, 04103 Leipzig, Germany.

## Representative NMR spectra for selected compounds

### NMR spectra of $P(2\text{-py})_3$ (**1**)

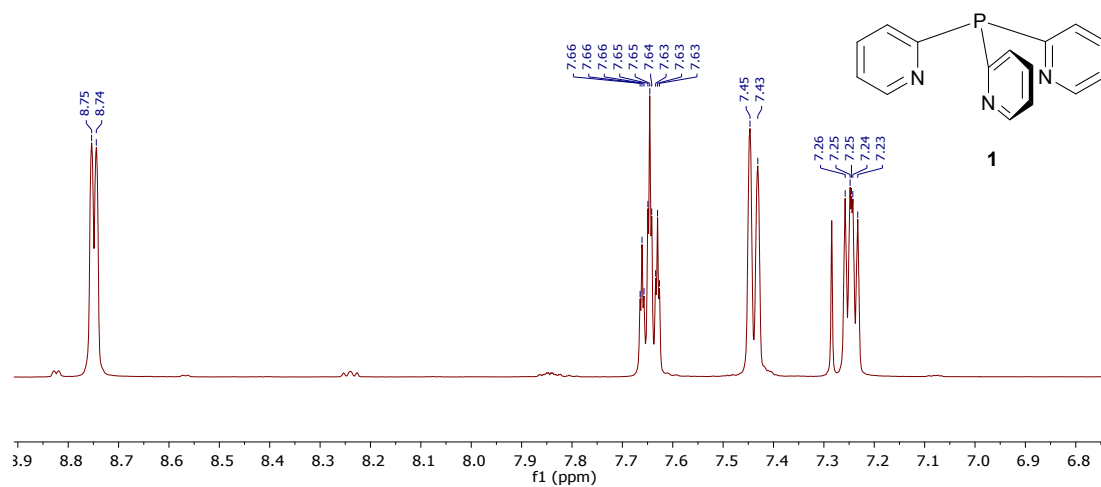

**Figure S1:**  $^1\text{H}$  NMR (298 K,  $\text{CDCl}_3$ , 500.20 MHz) spectrum of  $P(2\text{-py})_3$  (**1**).

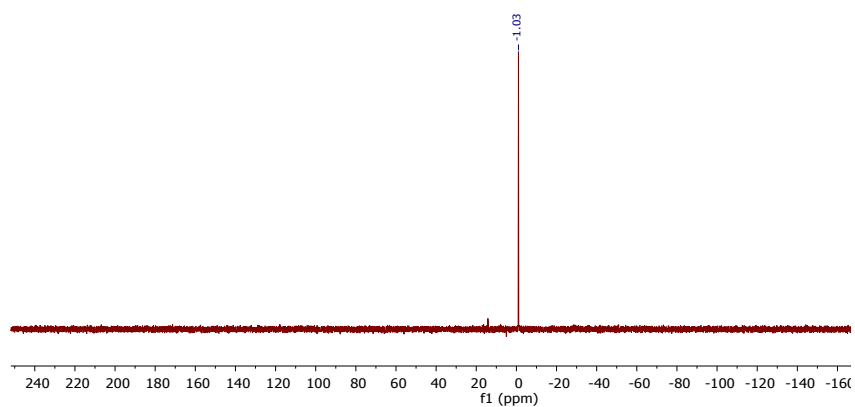

**Figure S2:**  $^{31}\text{P}\{^1\text{H}\}$  NMR (298 K,  $\text{CDCl}_3$ , 202.48 MHz) spectrum of  $P(2\text{-py})_3$  (**1**).

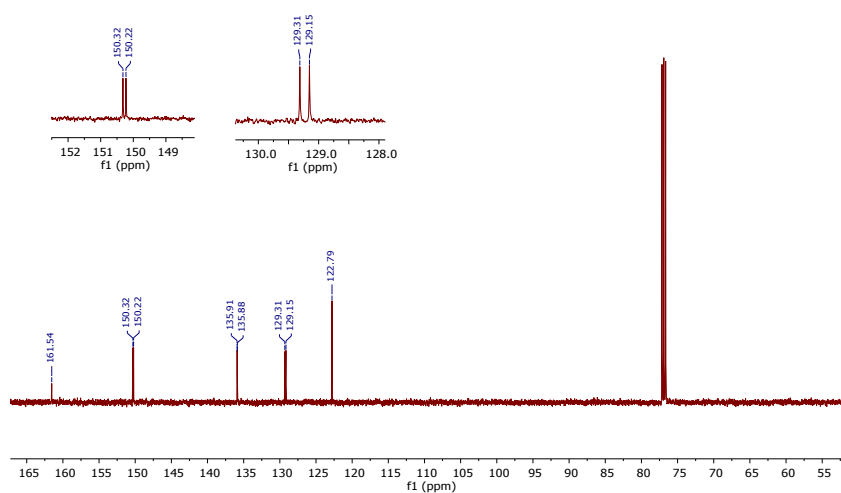

**Figure S3:**  $^{13}\text{C}\{^1\text{H}\}$  NMR (298 K,  $\text{CDCl}_3$ , 125.78 MHz) spectrum of  $P(2\text{-py})_3$  (**1**).

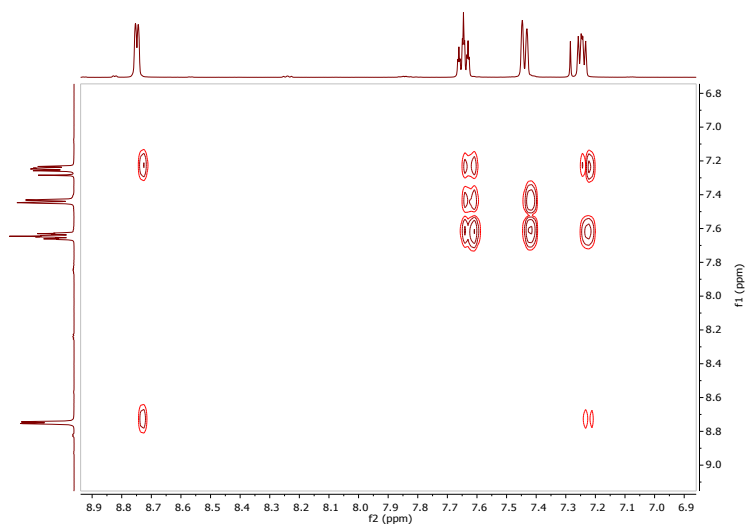

**Figure S4:**  $^1\text{H}$ - $^1\text{H}$  COSY (298 K,  $\text{CDCl}_3$ , 500.20 MHz) spectrum of  $P(2\text{-py})_3$  (**1**).

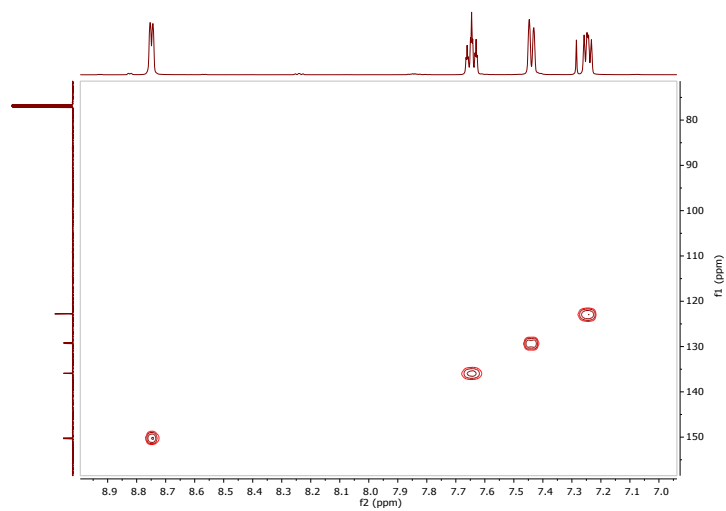

**Figure S5:**  $^1\text{H}$ - $^{13}\text{C}$  HMQC (298 K,  $\text{CDCl}_3$ , 500.20 MHz) spectrum of  $P(2\text{-py})_3$  (**1**).

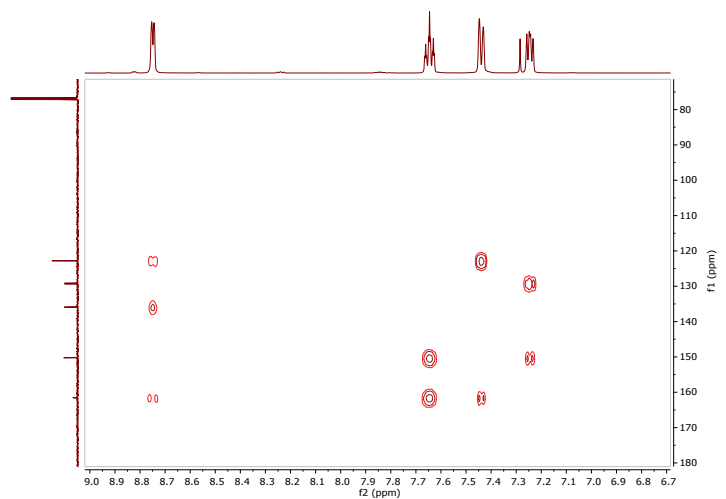

**Figure S6:**  $^1\text{H}$ - $^{13}\text{C}$  HMBC (298 K,  $\text{CDCl}_3$ , 500.20 MHz) spectrum of  $P(2\text{-py})_3$  (**1**).

## NMR spectra of P(6-Me-2-py)<sub>3</sub> (**2**)

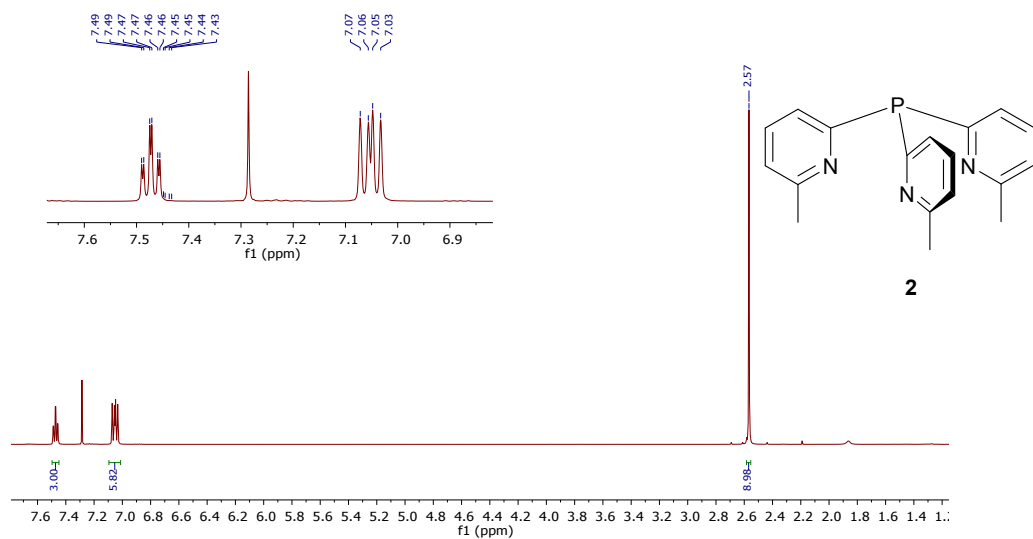

Figure S7: <sup>1</sup>H NMR (298 K, CDCl<sub>3</sub>, 500.20 MHz) spectrum of P(6-Me-2-py)<sub>3</sub> (**2**).

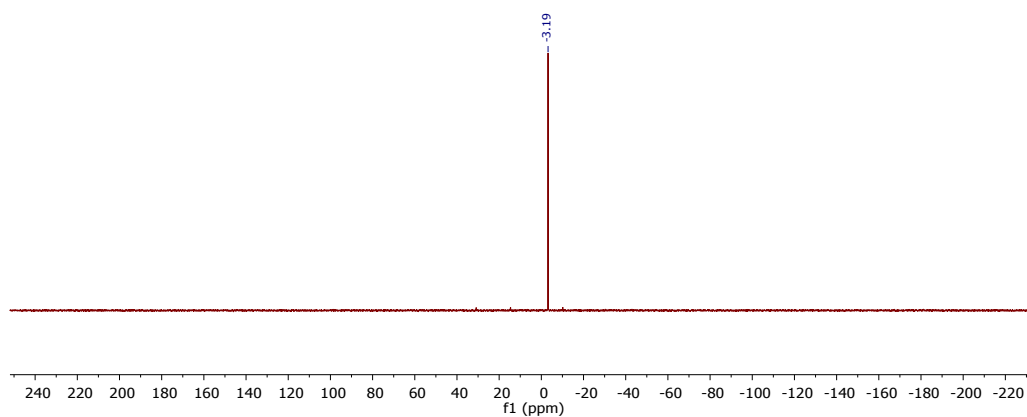

Figure S8: <sup>31</sup>P{<sup>1</sup>H} NMR (298 K, CDCl<sub>3</sub>, 202.48 MHz) spectrum of P(6-Me-2-py)<sub>3</sub> (**2**).

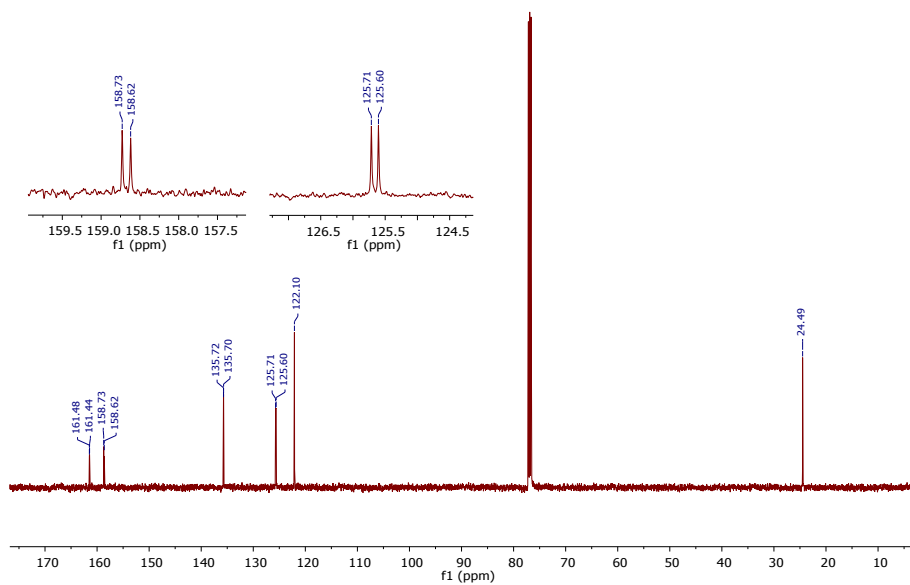

Figure S9: <sup>13</sup>C{<sup>1</sup>H} NMR (298 K, CDCl<sub>3</sub>, 125.78 MHz) spectrum of P(6-Me-2-py)<sub>3</sub> (**2**).

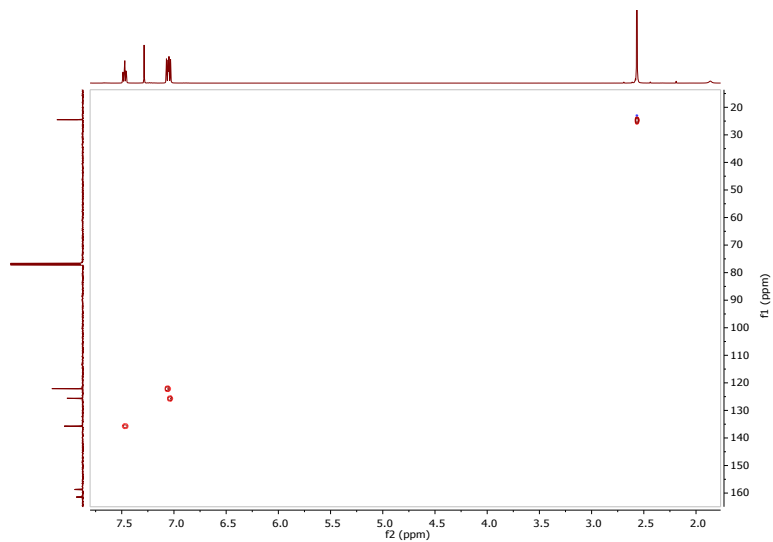

Figure S10:  $^1\text{H}$ - $^{13}\text{C}$  HMQC (298 K,  $\text{CDCl}_3$ , 500.20 MHz) spectrum of  $\text{P}(6\text{-Me-2-py})_3$  (**2**).

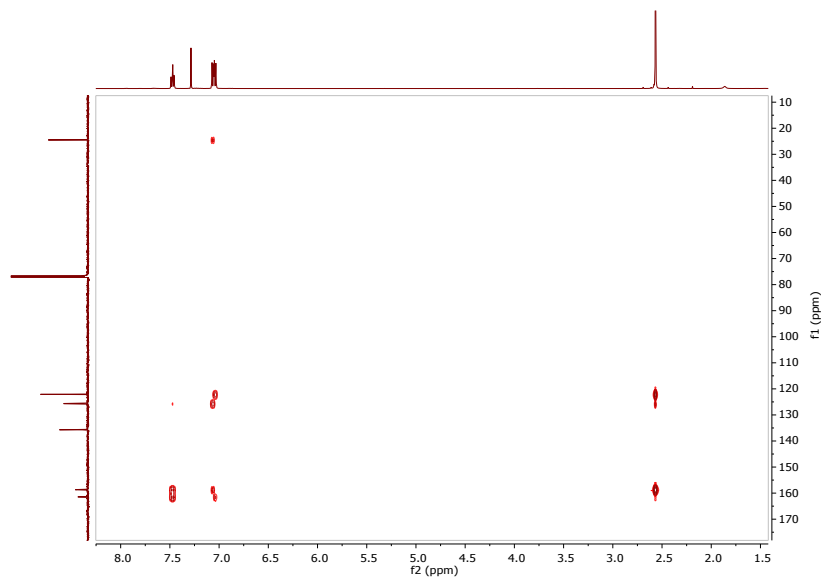

Figure S11:  $^1\text{H}$ - $^{13}\text{C}$  HMBC (298 K,  $\text{CDCl}_3$ , 500.20 MHz) spectrum of  $\text{P}(6\text{-Me-2-py})_3$  (**2**).

### NMR spectra of $\text{P}(6\text{-Br-2-py})_3$ (**3**)

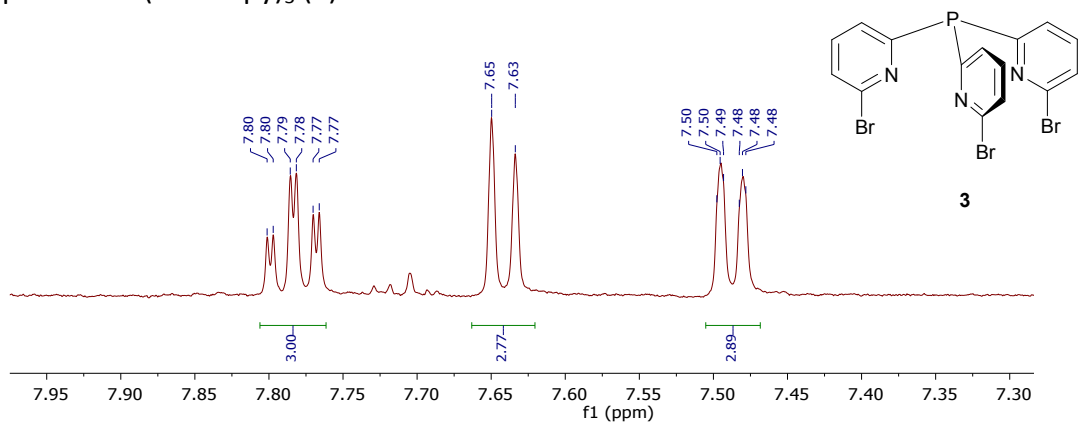

Figure S12:  $^1\text{H}$  NMR (298 K,  $\text{CD}_3\text{COCD}_3$ , 500.20 MHz) spectrum of  $\text{P}(6\text{-Br-2-py})_3$  (**3**).

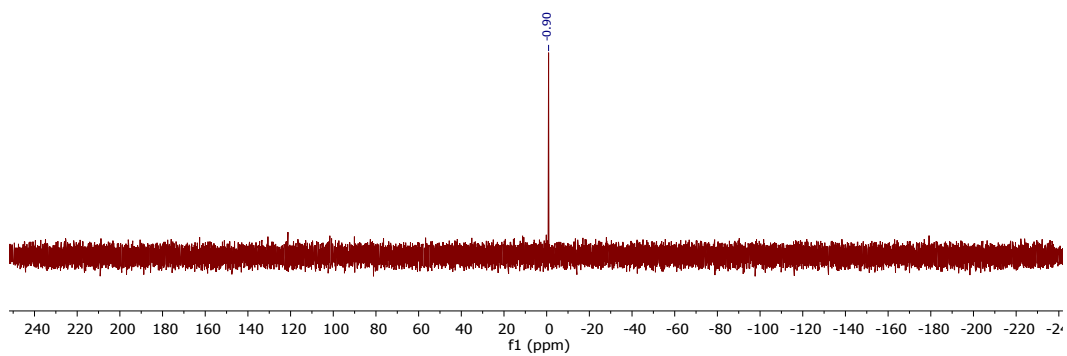

Figure S13:  $^{31}\text{P}\{^1\text{H}\}$  NMR (298 K,  $\text{CD}_3\text{COCD}_3$ , 202.48 MHz) spectrum of  $\text{P}(6\text{-Br-2-py})_3$  (**3**).

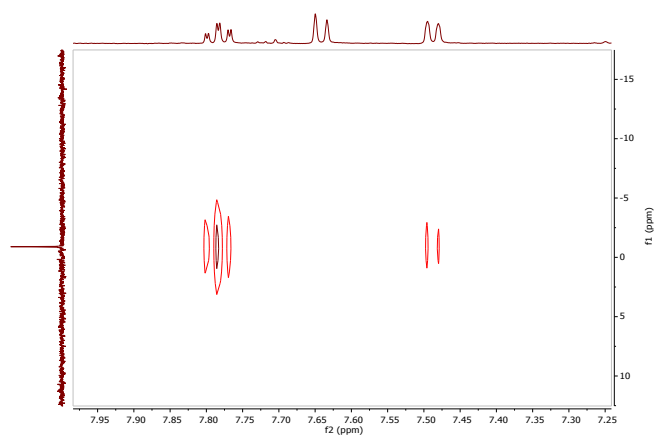

Figure S14:  $^1\text{H-}^{31}\text{P}\{^1\text{H}\}$  HMQC (298 K,  $\text{CD}_3\text{COCD}_3$ , 500.20 MHz) spectrum of  $\text{P}(6\text{-Br-2-py})_3$  (**3**).

#### NMR spectra of $[\{\text{P}(2\text{-py})_3\}_2\text{Fe}](\text{OTf})_2$ (**4**)

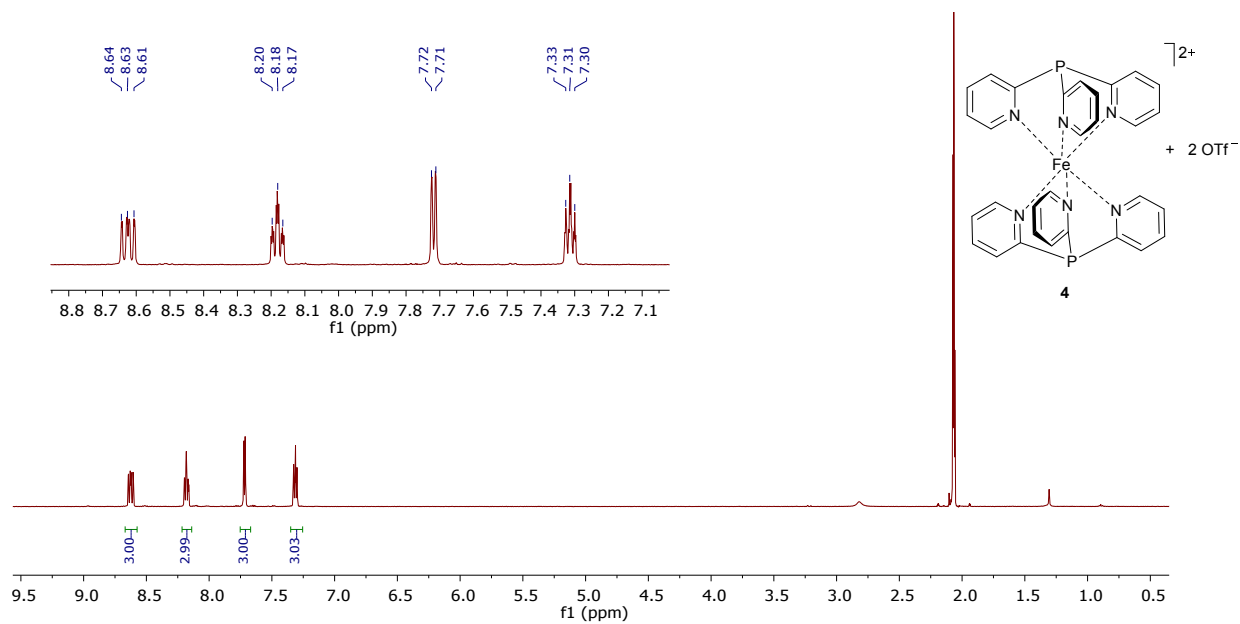

Figure S15:  $^1\text{H}$  NMR (298 K,  $\text{CD}_3\text{COCD}_3$ , 500.20 MHz) spectrum of  $[\{\text{P}(2\text{-py})_3\}_2\text{Fe}](\text{OTf})_2$  (**4**).

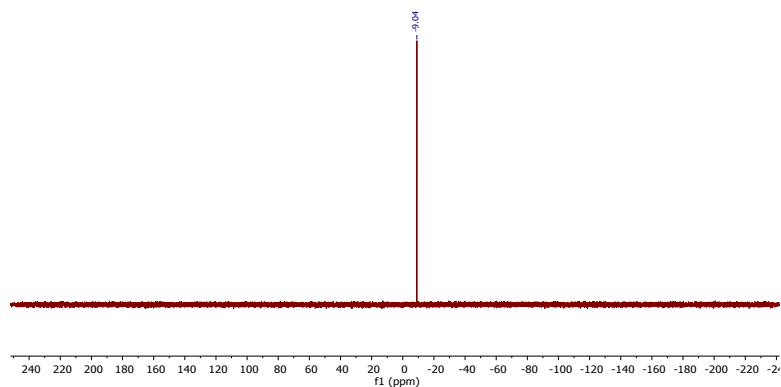

**Figure S16:**  $^{31}\text{P}\{^1\text{H}\}$  NMR (298 K,  $\text{CD}_3\text{COCD}_3$ , 202.48 MHz) spectrum of  $[\{\text{P}(2\text{-py})_3\}_2\text{Fe}(\text{OTf})_2]$  (**4**).

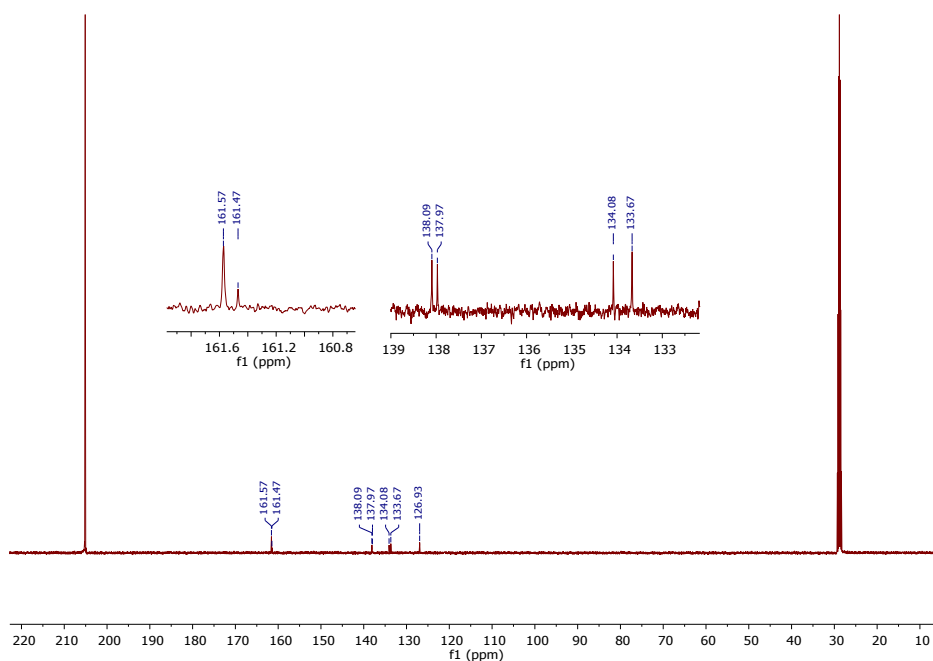

**Figure S17:**  $^{13}\text{C}\{^1\text{H}\}$  NMR (298 K,  $\text{CD}_3\text{COCD}_3$ , 125.78 MHz) spectrum of  $[\{\text{P}(2\text{-py})_3\}_2\text{Fe}(\text{OTf})_2]$  (**4**).

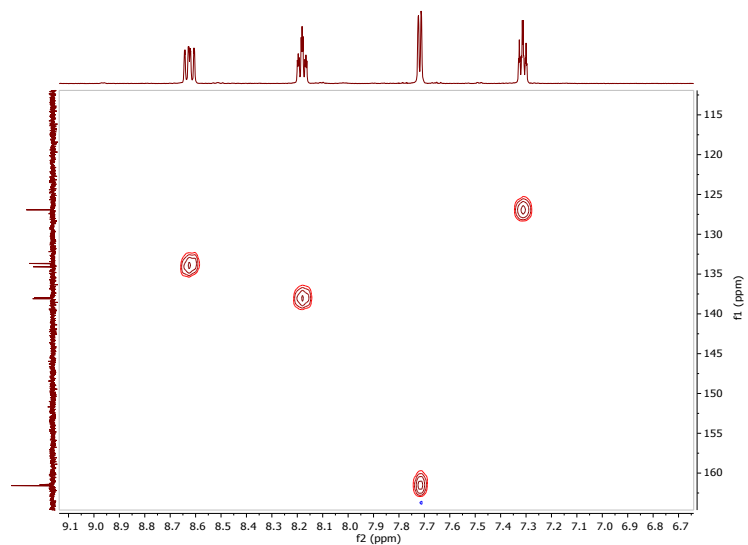

**Figure S18:**  $^1\text{H}-^{13}\text{C}$  HMQC (298 K,  $\text{CD}_3\text{COCD}_3$ , 500.20 MHz) spectrum of  $[\{\text{P}(2\text{-py})_3\}_2\text{Fe}(\text{OTf})_2]$  (**4**).

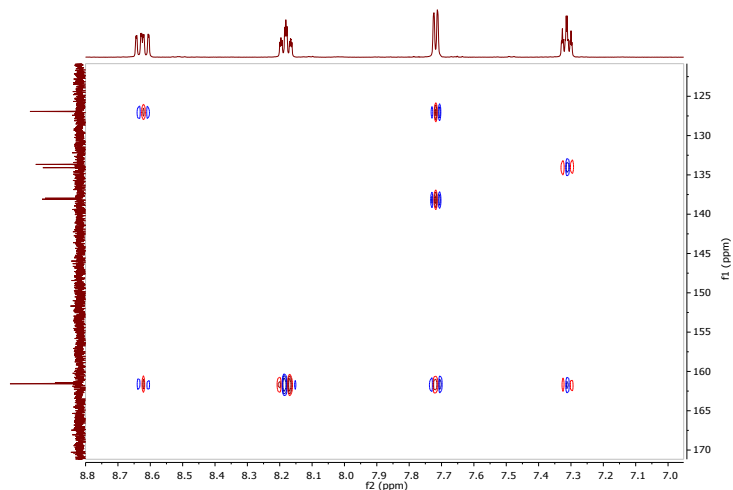

Figure S19:  $^1\text{H}$ - $^{13}\text{C}$  HMBC (298 K,  $\text{CD}_3\text{COCD}_3$ , 500.20 MHz) spectrum of  $[\{\text{P}(2\text{-py})_3\}_2\text{Fe}](\text{OTf})_2$  (**4**).

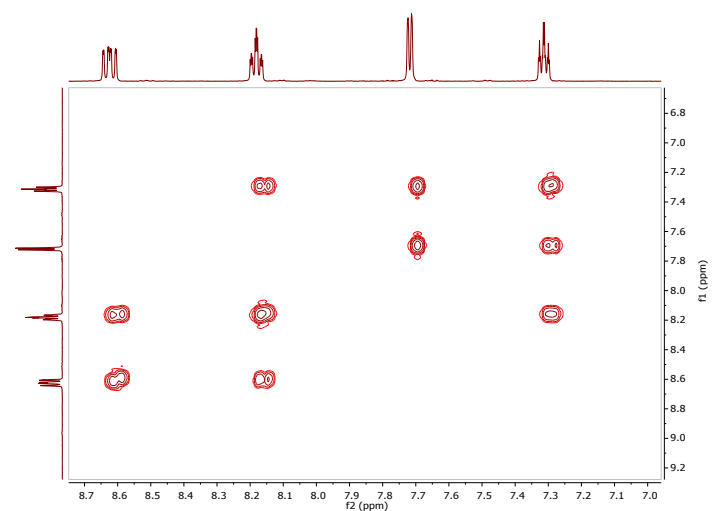

Figure S20:  $^1\text{H}$ - $^1\text{H}$  COSY (298 K,  $\text{CD}_3\text{COCD}_3$ , 500.20 MHz) spectrum of  $[\{\text{P}(2\text{-py})_3\}_2\text{Fe}](\text{OTf})_2$  (**4**).

### NMR spectra of $[(\text{MeCN})_3\text{Cu}\{\text{P}(6\text{-Me-2-py})_3\}\text{Cu}(\text{MeCN})](\text{PF}_6)_2$ (**7**)

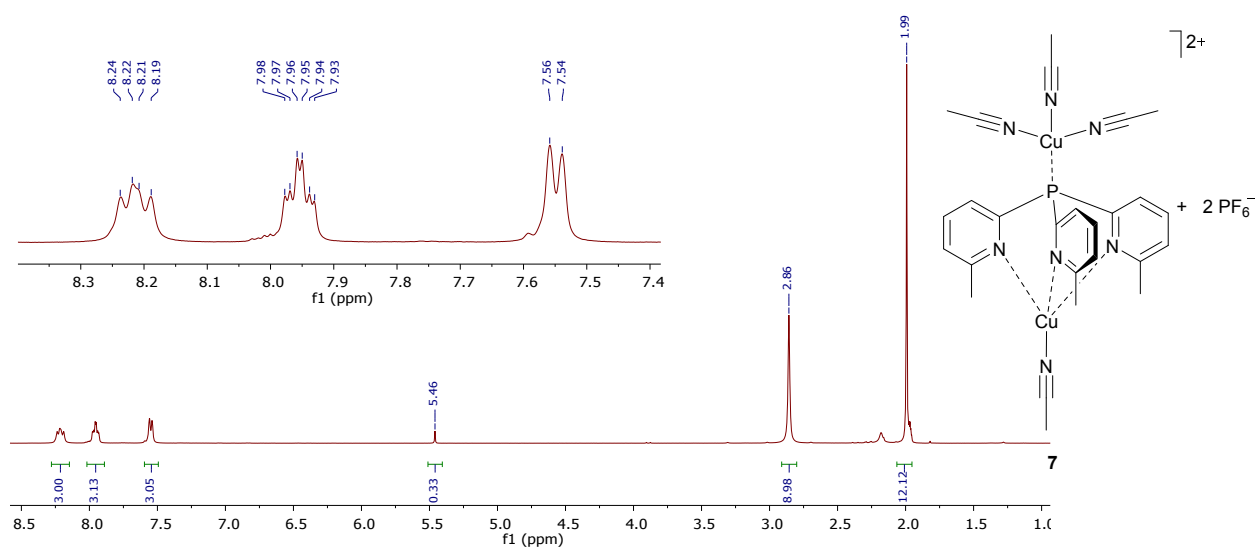

Figure S21:  $^1\text{H}$  NMR (298 K,  $\text{CD}_3\text{CN}$ , 400.13 MHz) spectrum of  $[(\text{MeCN})_3\text{Cu}\{\text{P}(6\text{-Me-2-py})_3\}\text{Cu}(\text{MeCN})](\text{PF}_6)_2$  (**7**).



Note: The acetonitrile solvent residual signal overlaps with the signal of the coordinated CH<sub>3</sub>CN molecules at 1.99 ppm. Furthermore, the peak at 5.46 ppm arises from CH<sub>2</sub>Cl<sub>2</sub>.

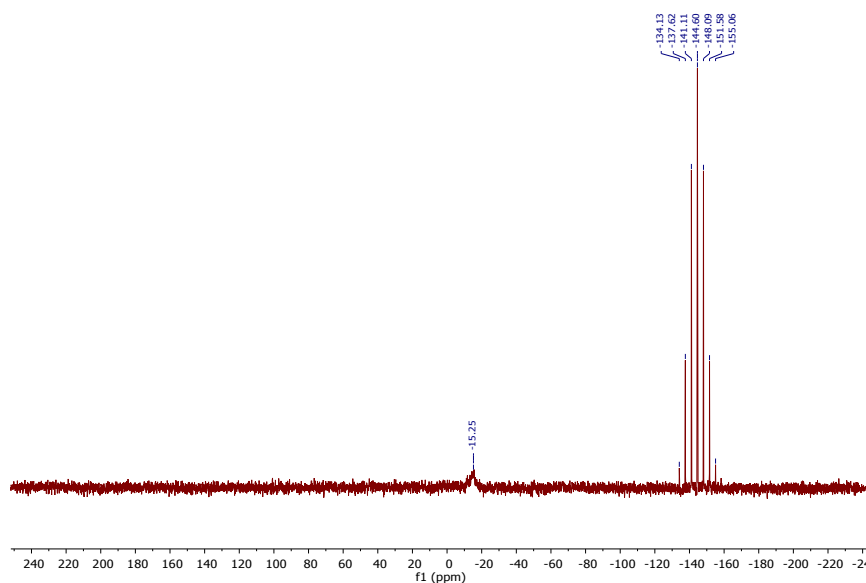

**Figure S22:** <sup>31</sup>P{<sup>1</sup>H} NMR (298 K, CD<sub>3</sub>CN, 202.48 MHz) spectrum of [(MeCN)<sub>3</sub>Cu{P(6-Me-2-py)<sub>3</sub>}Cu(MeCN)](PF<sub>6</sub>)<sub>2</sub> (**7**).

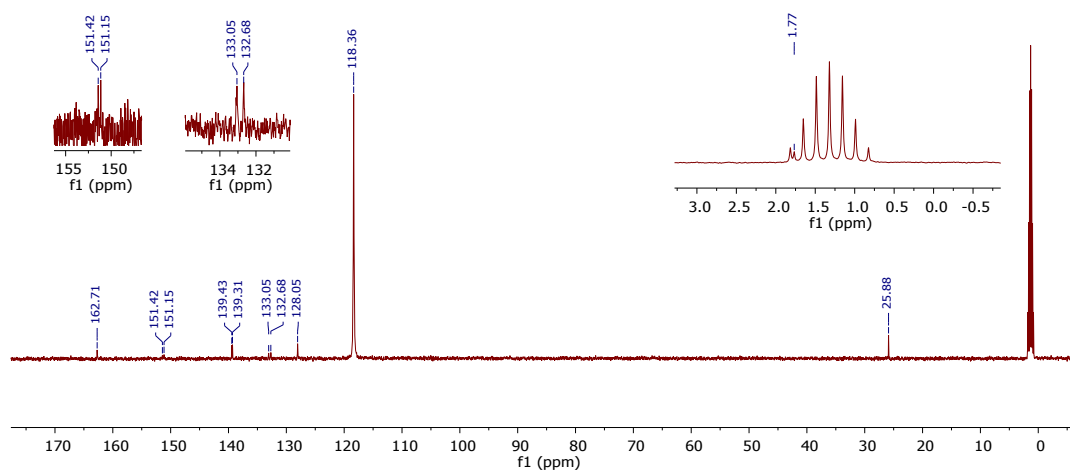

**Figure S23:** <sup>13</sup>C{<sup>1</sup>H} NMR (298 K, CD<sub>3</sub>CN, 125.78 MHz) spectrum of [(MeCN)<sub>3</sub>Cu{P(6-Me-2-py)<sub>3</sub>}Cu(MeCN)](PF<sub>6</sub>)<sub>2</sub> (**7**).

Note: The solvent residual peak of acetonitrile (septet at 1.32 ppm) overlaps with the signal of the coordinated CH<sub>3</sub>CN molecules (1.77 ppm). The same observation was made for the second solvent residual peak of acetonitrile, which also overlaps with the signal of the coordinated CH<sub>3</sub>CN molecules at 118.36 ppm.

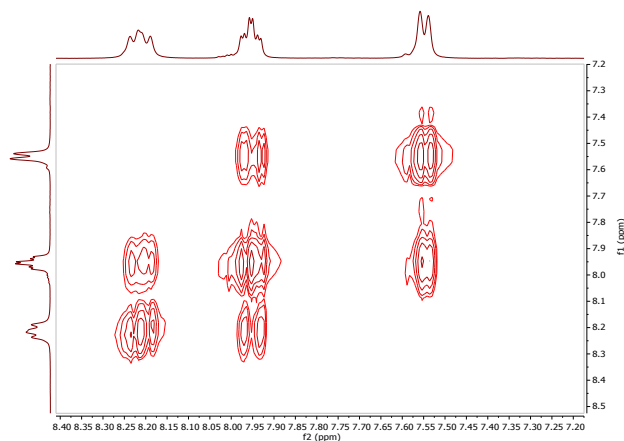

**Figure S24:** <sup>1</sup>H-<sup>1</sup>H COSY (298 K, CD<sub>3</sub>CN, 400.13 MHz) spectrum of [(MeCN)<sub>3</sub>Cu{P(6-Me-2-py)<sub>3</sub>}Cu(MeCN)](PF<sub>6</sub>)<sub>2</sub> (**7**).

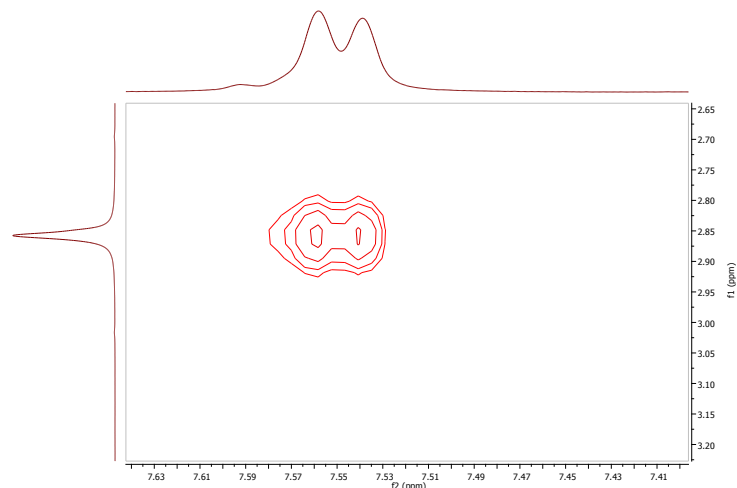

**Figure S25:** Section of the  $^1\text{H}$ - $^1\text{H}$  NOESY (298 K,  $\text{CD}_3\text{CN}$ , 400.13 MHz) spectrum of  $[(\text{MeCN})_3\text{CuP}(6\text{-Me-2-py})_3\text{Cu}(\text{MeCN})](\text{PF}_6)_2$  (**7**).

Note: The crosspeak between H(5) and the  $\text{CH}_3$  group of the  $\text{P}(6\text{-Me-2-py})_3$  ligand (**2**) in the  $^1\text{H}$ - $^1\text{H}$  NOESY spectrum of **7** arises from intramolecular cross-relaxation of protons, which are in close spatial proximity. The observation of this crosspeak confirms the assignment of H(5). This was the only crosspeak observed between a pyridyl-H and the  $6\text{-CH}_3$ -group.

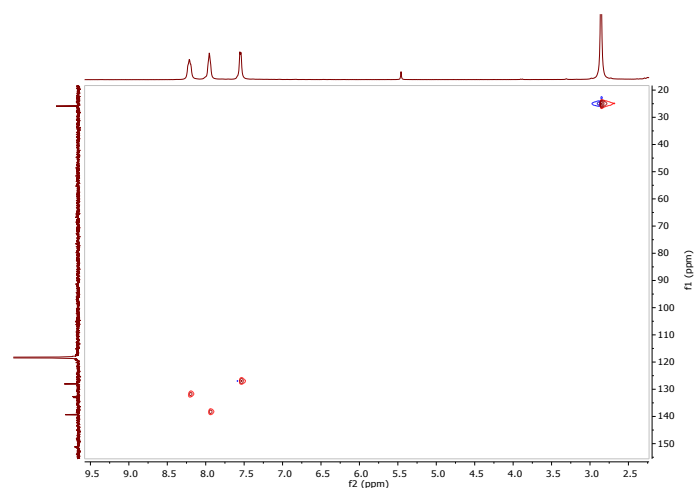

**Figure S26:**  $^1\text{H}$ - $^{13}\text{C}$  HMQC (298 K,  $\text{CD}_3\text{CN}$ , 500.20 MHz) spectrum of  $[(\text{MeCN})_3\text{CuP}(6\text{-Me-2-py})_3\text{Cu}(\text{MeCN})](\text{PF}_6)_2$  (**7**).

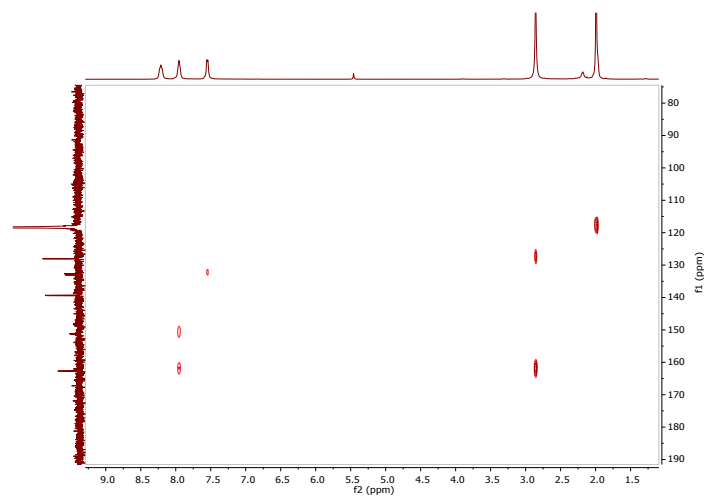

**Figure S27:**  $^1\text{H}$ - $^{13}\text{C}$  HMBC (298 K,  $\text{CD}_3\text{CN}$ , 500.20 MHz) spectrum of  $[(\text{MeCN})_3\text{CuP}(6\text{-Me-2-py})_3\text{Cu}(\text{MeCN})](\text{PF}_6)_2$  (**7**).

## UV-visible spectroscopy

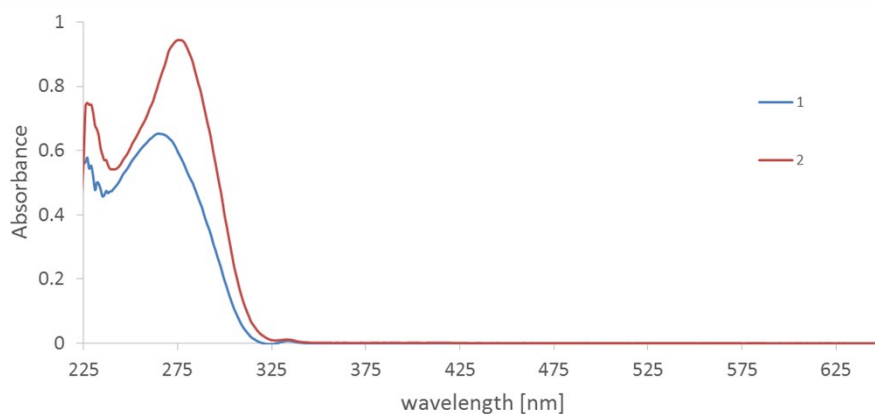

**Figure S28:** UV-visible spectra of the ligands **1** (blue) and **2** (red). Spectra were recorded in  $\text{CH}_2\text{Cl}_2$  (both at a concentration of  $5.0 \cdot 10^{-5} \text{ mol L}^{-1}$ ). Background solvent corrections were applied.

**Table S1:** Molar extinction coefficients calculated from UV-visible spectra (all at a concentration of  $5.0 \cdot 10^{-5} \text{ mol L}^{-1}$ )

| Compound         | Solvent                  | Wavelength $\lambda$ [nm] | Absorbance | Molar extinction coefficient $\epsilon \left[ \frac{\text{L}}{\text{cm} \cdot \text{mol}} \right]$ |
|------------------|--------------------------|---------------------------|------------|----------------------------------------------------------------------------------------------------|
| <b>1</b>         | $\text{CH}_2\text{Cl}_2$ | 268.0                     | 0.649      | 12976.5                                                                                            |
| <b>2</b>         | $\text{CH}_2\text{Cl}_2$ | 281.0                     | 0.905      | 18107.2                                                                                            |
| <b>4</b>         | $\text{CH}_2\text{Cl}_2$ | 475.0                     | 0.592      | 11834.3                                                                                            |
|                  |                          | 379.9                     | 0.411      | 8227.6                                                                                             |
|                  |                          | 300.9                     | 0.155      | 3091.5                                                                                             |
|                  |                          | 267.0                     | 1.850      | 37003.1                                                                                            |
| <b>4</b>         | MeOH                     | 476.0                     | 0.491      | 9816.5                                                                                             |
|                  |                          | 382.0                     | 0.338      | 6751.2                                                                                             |
|                  |                          | 297.0                     | 0.179      | 3579.5                                                                                             |
|                  |                          | 267.0                     | 1.598      | 31915.5                                                                                            |
| <b>5-toluene</b> | $\text{CH}_3\text{CN}$   | 367.1                     | 0.455      | 9102.5                                                                                             |
|                  |                          | 313.9                     | 0.784      | 15682.3                                                                                            |
|                  |                          | 276.0                     | 1.519      | 30379.6                                                                                            |
| <b>6-2THF</b>    | MeOH                     | 276.9                     | 0.434      | 8685.3                                                                                             |
| <b>7</b>         | $\text{CH}_3\text{CN}$   | 363.0                     | 0.202      | 4036.6                                                                                             |
|                  |                          | 276.9                     | 1.517      | 30344.8                                                                                            |

## Single-crystal X-ray crystallography

**Table S2:** Crystallographic parameters.

| Compound reference              | <b>2</b>                                       | <b>3</b>                                               | <b>4</b>                                                                                                      | <b>5.toluene</b>                                                                       | <b>6.2THF</b>                                                                                   | <b>7</b>                                                                        |
|---------------------------------|------------------------------------------------|--------------------------------------------------------|---------------------------------------------------------------------------------------------------------------|----------------------------------------------------------------------------------------|-------------------------------------------------------------------------------------------------|---------------------------------------------------------------------------------|
| Chemical formula                | $\text{C}_{18}\text{H}_{18}\text{N}_3\text{P}$ | $\text{C}_{15}\text{H}_9\text{Br}_3\text{N}_3\text{P}$ | $\text{C}_{30}\text{H}_{24}\text{FeN}_6\text{P}_2^{2+}$<br>( $\text{CF}_3\text{O}_3\text{S}^-$ ) <sub>2</sub> | $\text{C}_{18}\text{H}_{18}\text{Cl}_2\text{FeN}_3\text{P} \cdot \text{C}_7\text{H}_8$ | $\text{C}_{19}\text{H}_{18}\text{ClF}_3\text{FeN}_3\text{O} \cdot \text{C}_4\text{H}_8\text{O}$ | $\text{C}_{26}\text{H}_{30}\text{Cu}_2\text{N}_7\text{P}^{2+}(\text{PF}_6^-)_2$ |
| Formula mass                    | 307.32                                         | 501.95                                                 | 884.48                                                                                                        | 526.21                                                                                 | 619.80                                                                                          | 888.56                                                                          |
| Crystal system                  | trigonal                                       | trigonal                                               | monoclinic                                                                                                    | triclinic                                                                              | monoclinic                                                                                      | triclinic                                                                       |
| a/Å                             | 30.7488(8)                                     | 15.7876(6)                                             | 17.6327(9)                                                                                                    | 8.0155(3)                                                                              | 13.7879(4)                                                                                      | 8.2686(5)                                                                       |
| b/Å                             | 30.7488(8)                                     | 15.7876(6)                                             | 20.0111(11)                                                                                                   | 10.7101(4)                                                                             | 8.6473(2)                                                                                       | 14.9441(9)                                                                      |
| c/Å                             | 11.8199(4)                                     | 11.1637(5)                                             | 19.8093(10)                                                                                                   | 15.0458(6)                                                                             | 22.5638(6)                                                                                      | 14.9496(8)                                                                      |
| $\alpha/^\circ$                 | 90                                             | 90                                                     | 90                                                                                                            | 98.595(2)                                                                              | 90                                                                                              | 78.976(2)                                                                       |
| $\beta/^\circ$                  | 90                                             | 90                                                     | 91.836(2)                                                                                                     | 99.108(2)                                                                              | 95.0326(12)                                                                                     | 80.942(2)                                                                       |
| $\gamma/^\circ$                 | 120                                            | 120                                                    | 90                                                                                                            | 91.742(2)                                                                              | 90                                                                                              | 84.159(2)                                                                       |
| Unit cell volume/Å <sup>3</sup> | 9678.3(6)                                      | 2409.7(2)                                              | 6986.1(6)                                                                                                     | 1259.09(8)                                                                             | 2679.87(12)                                                                                     | 1785.67(18)                                                                     |
| Temperature/K                   | 180(2)                                         | 180(2)                                                 | 180(2)                                                                                                        | 180(2)                                                                                 | 180(2)                                                                                          | 180(2)                                                                          |
| Space group                     | <i>R</i> 3c                                    | <i>R</i> 3c                                            | <i>P</i> 2 <sub>1</sub> / <i>n</i>                                                                            | <i>P</i> -1                                                                            | <i>P</i> 2/ <i>c</i>                                                                            | <i>P</i> -1                                                                     |

|                                                                  |              |              |              |              |              |              |
|------------------------------------------------------------------|--------------|--------------|--------------|--------------|--------------|--------------|
| Z                                                                | 24           | 6            | 8            | 2            | 4            | 2            |
| Radiation type                                                   | CuK $\alpha$ |
| Absorption coefficient, $\mu/\text{mm}^{-1}$                     | 1.495        | 10.247       | 6.234        | 7.489        | 7.225        | 3.598        |
| No. of reflections measured                                      | 35814        | 7384         | 103989       | 14375        | 32629        | 45856        |
| No. of independent reflections                                   | 3769         | 941          | 12364        | 4367         | 4745         | 6267         |
| $R_{\text{int}}$                                                 | 0.036        | 0.062        | 0.054        | 0.042        | 0.036        | 0.031        |
| Final R1 values ( $I > 2\sigma(I)$ )                             | 0.028        | 0.033        | 0.039        | 0.045        | 0.036        | 0.049        |
| Final $wR(F^2)$ values ( $I > 2\sigma(I)$ )                      | 0.072        | 0.061        | 0.094        | 0.092        | 0.088        | 0.126        |
| Final R1 values (all data)                                       | 0.031        | 0.039        | 0.052        | 0.059        | 0.042        | 0.054        |
| Final $wR(F^2)$ values (all data)                                | 0.074        | 0.062        | 0.102        | 0.098        | 0.094        | 0.130        |
| Goodness of fit on $F^2$                                         | 1.05         | 1.09         | 1.02         | 1.06         | 1.07         | 1.03         |
| Flack x determined using quotients $[(I^+)-(I^-)]/[(I^+)+(I^-)]$ | 0.03(1)      | -0.01(3)     |              |              |              |              |

### Note regarding the structures of **2** and **3**

The structures of **2** (methyl derivative) and **3** (bromo derivative) are very closely comparable. However, **2** appears to adopt a superstructure with a unit-cell volume four times that of **3**. While **3** contains only  $\frac{1}{2}$  of a molecule in the asymmetric unit, **2** contains  $1+\frac{1}{2}$ . The structure of **2** contains local translations that amount to  $C$ -centring ( $\frac{1}{2}, \frac{1}{2}, 0$ ) in the reported  $R$ -centred cell. If these translations are considered to be real, the structure can be described with a subcell essentially identical to **3**. However, reconstructed precession images show clearly that the additional diffraction peaks are present and that the supercell is appropriate (Figure S29). For **3**, there is no sign of any additional diffraction peaks to indicate a larger cell. Thus, we conclude that the supercell structure for **2** is genuine, at least for the crystal examined. Refining **2** in the smaller cell analogous to **3** does produce a satisfactory refinement, but with somewhat elongated displacement ellipsoids, especially for the methyl group (of which there is only one unique in that representation) (Figure S30).

**Figure S29:** Reconstructed precession images for **2**, showing the consistency between the diffraction pattern and the reported supercell description indicated by the predicted reflection positions (green circles). No such additional spots appear in the diffraction pattern of **3**.

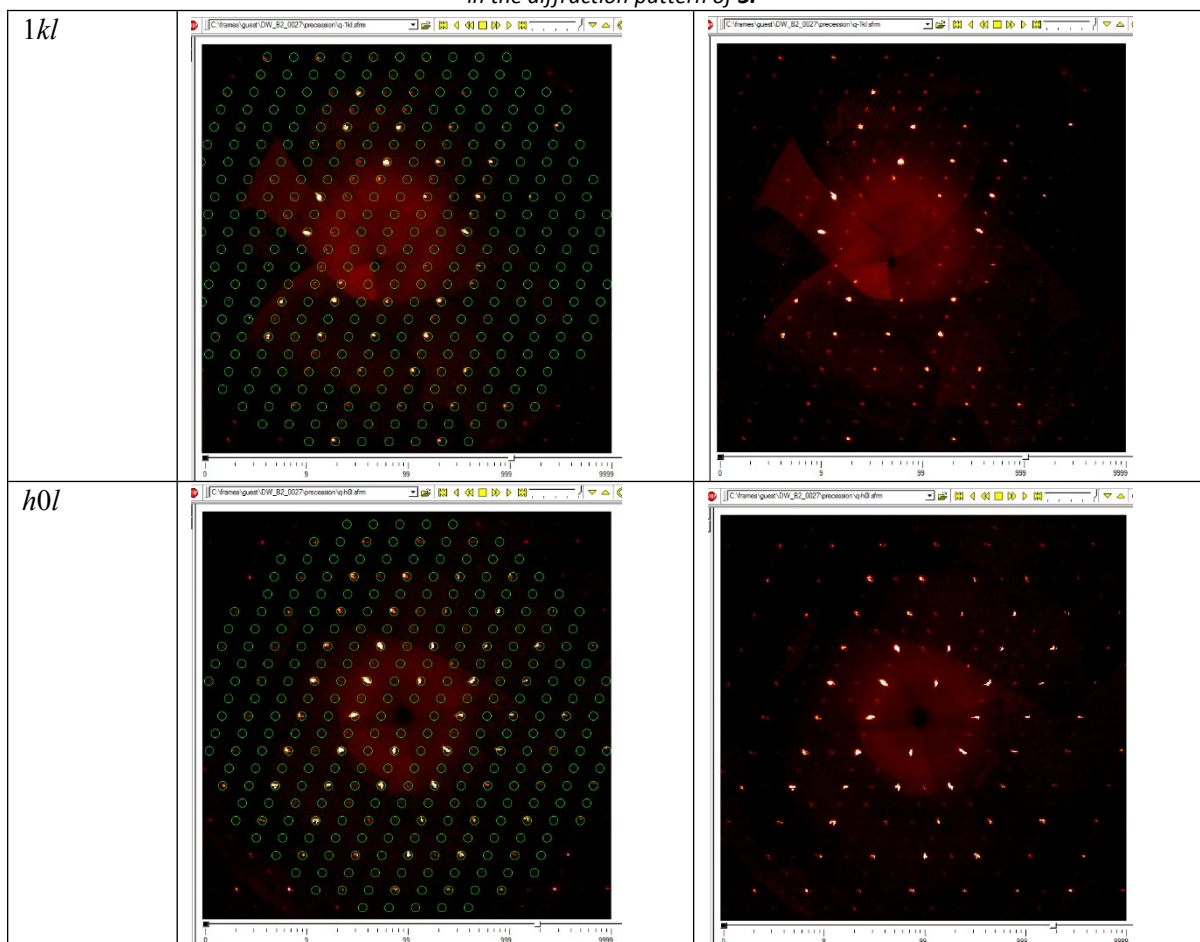

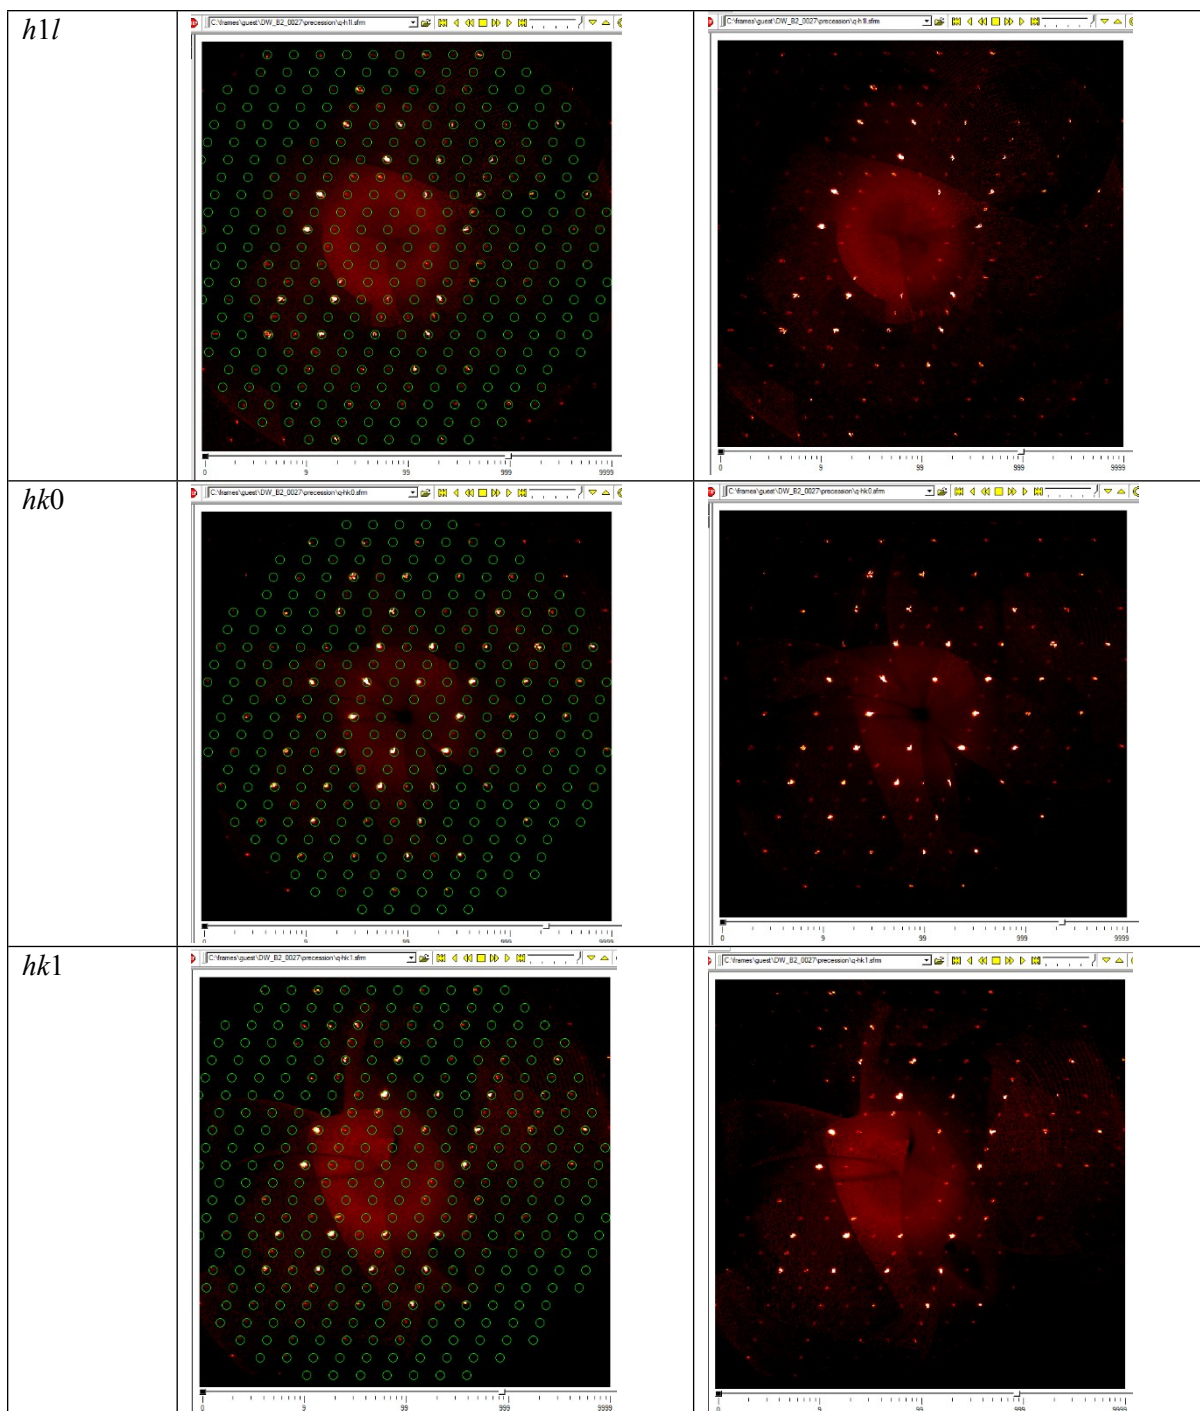

**Figure S30.** Displacement ellipsoid plot for the asymmetric unit of **2** in the subcell analogous to **3**.

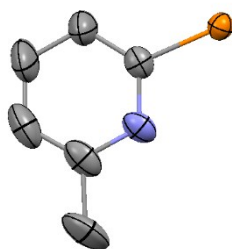

Supplement: c5dt04155d1.pdf [file c5dt04155d1.pdf]
